# Supplementary material for: Zoonotic Pathogens of Dromedary Camels in Kenya: A Systematised Review
Source: PubMed Central journal article supplement (PMC7559378; doi:10.3390/vetsci7030103), 2020-08-05
Supplement: vetsci-07-00103-s001.pdf [file vetsci-07-00103-s001.pdf]

## Figure S1

### **Title and abstract inclusion/exclusion protocol**

1. Study population
  - a. Include if:
    - i. Dromedary or camel included in study
  - b. Exclude if:
    - i. Only species other than Dromedary camel
2. Geographic location
  - a. Include if:
    - i. Presents data from Kenya
    - ii. Presents data from several countries, including Kenya
    - iii. Presents data on biological samples of Kenyan origin
  - b. Exclude if:
    - i. Presents data only from countries other than Kenya
3. Pathogen
  - a. Include if:
    - i. Potentially zoonotic pathogen of camels transmitted via contact, vector, aerosol or fomites
  - b. Exclude if:
    - i. Food-borne or other orally transmitted pathogen or commensal organism of camels which may cause human disease
4. Date
  - a. Include if:
    - i. Published up to 31 December 2017
5. Article type
  - a. Include if:
    - i. Peer-reviewed journal article, conference proceedings, PhD or Master's Thesis
  - b. Exclude if:
    - i. Review article not presenting original data
    - ii. Textbooks and clinical guides not presenting original data
    - iii. Newspaper articles and other lay media publications
6. Study type
  - a. Include:
    - i. Cross-sectional studies
    - ii. Case-control studies
    - iii. Cohort studies
    - iv. Retrospective or prospective study designs
    - v. Case studies
    - vi. Treatment trials undertaken in naturally infected camels
    - vii. Diagnostic test studies using naturally infected camels
    - viii. Studies presenting data related to molecular or genetic characterisation of naturally occurring infections
    - ix. Studies that present ethno-graphic or socio-economic data as well as original biological data

- b. Exclude:
  - i. Experimental study design, including in vitro and in vivo studies examining cellular, molecular or other aspects of infection not occurring in naturally infected animals
  - ii. Studies dealing with physiological response to infections in naturally infected animals
  - iii. Laboratory methods descriptions and reviews which do not provide data on naturally occurring infections in Kenya
  - iv. Diagnostic test validation studies which do not present data on naturally occurring infection in Kenya
  - v. Studies evaluating physiological, cellular or other responses to treatment
  - vi. Studies presenting ethnographic data on camel diseases without original biological data
  - vii. Studies concerned with other socio-economic aspects of camel disease without presenting original biological data
  - viii. Studies which presented evidence of suspected diagnosis not confirmed by laboratory testing

References for which no abstract is available and those which do not conclusively meet the inclusion/exclusion criteria after title/abstract review should be carried forward for full-text analysis.

## Figure S2

### **Full text inclusion/exclusion criteria**

The above criteria are also applied to the full text review, with the following additional conditions:

1. Language
  - a. Include if:
    - i. Full text available in English
  - b. Exclude if:
    - i. Full text not available in English
    - ii. Abstract only available in English, full text only available in language other than English
2. Article type
  - a. Include if:
    - i. Full text available
  - b. Exclude if:
    - i. Abstract only published
    - ii. Conference proceeding without full text available
3. Study population
  - a. Exclude if:
    - i. Population already under treatment for pathogen of interest
4. Study type
  - a. Exclude if:
    - i. Treatment or diagnostic test studies which does not present evidence of prevalence or incidence of infection in population prior to treatment
    - ii. Studies reporting development of molecular techniques (e.g. PCR etc) which do not also provide epidemiological information on natural infections in Kenya
    - iii. Phylogenetic studies which do not also provide epidemiological information regarding natural infections in Ken
